# Supplementary material
Source: PubMed Central journal article supplement (PMC6331203)
Supplement: NIHMS979860-supplement-Suppl__3.pdf [file NIHMS979860-supplement-Suppl__3.pdf]

Supplementary Table 1. List of primary and secondary antibodies.

| Antibody        | Species | Source                              | Dilution             | Catalog #   | URL                                                                                                                                                                                                                                           |
|-----------------|---------|-------------------------------------|----------------------|-------------|-----------------------------------------------------------------------------------------------------------------------------------------------------------------------------------------------------------------------------------------------|
| CD31            | Rat     | Biologend                           | 1:200                | 102501      | <a href="https://www.biologend.com/fr-ch/products/purified-anti-mouse-cd31-antibody-380">https://www.biologend.com/fr-ch/products/purified-anti-mouse-cd31-antibody-380</a>                                                                   |
| huCD31          | Mouse   | Biologend                           | 1:200                | 303101      | <a href="https://www.biologend.com/fr-ch/products/purified-anti-human-cd31-antibody-883">https://www.biologend.com/fr-ch/products/purified-anti-human-cd31-antibody-883</a>                                                                   |
| Ctip2           | Rat     | Abcam                               | 1:200 O<br>1:100 T   | ab18465     | <a href="http://www.abcam.com/ctip2-antibody-25b6-chip-grade-ab18465.html">http://www.abcam.com/ctip2-antibody-25b6-chip-grade-ab18465.html</a>                                                                                               |
| Endoglin        | Goat    | R&D                                 | 1:100                | BAF1320     | <a href="https://www.rndsystems.com/products/mouse-endoglin-cd105-biotinylated-antibody_baf1320">https://www.rndsystems.com/products/mouse-endoglin-cd105-biotinylated-antibody_baf1320</a>                                                   |
| GFAP            | Chicken | EMD Millipore                       | 1:2000 O<br>1:1000 T | AB5541      | <a href="http://www.emdmillipore.com/US/en/product/Anti-Glial-Fibrillary-Acidic-Protein-Antibody_MM_NF-AB5541">http://www.emdmillipore.com/US/en/product/Anti-Glial-Fibrillary-Acidic-Protein-Antibody_MM_NF-AB5541</a>                       |
| huGFAP          | Mouse   | Biologend                           | 1:500 O<br>1:250 T   | 837201      | <a href="https://www.biologend.com/fr-ch/products/anti-gfap-antibody-11057">https://www.biologend.com/fr-ch/products/anti-gfap-antibody-11057</a>                                                                                             |
| GFP             | Rabbit  | Invitrogen                          | 1:1000               | A6455       | <a href="https://www.thermofisher.com/antibody/product/GFP-Tag-Antibody-Polyclonal/A-6455">https://www.thermofisher.com/antibody/product/GFP-Tag-Antibody-Polyclonal/A-6455</a>                                                               |
| GFP             | Chicken | Aves Labs                           | 1:2000               | GFP-1020    | <a href="http://www.aveslab.com/products/epitope-tag-and-gfp-antibodies/anti-gfp-green-fluorescent-protein-antibodies-2/">http://www.aveslab.com/products/epitope-tag-and-gfp-antibodies/anti-gfp-green-fluorescent-protein-antibodies-2/</a> |
| Iba1            | Rabbit  | Wako Chem.                          | 1:1000 O<br>1:500 T  | NC9288364   | <a href="http://www.wako-chem.co.jp/english/labchem/product/life/AntiIba1/index.htm">http://www.wako-chem.co.jp/english/labchem/product/life/AntiIba1/index.htm</a>                                                                           |
| MAP2            | Chicken | Abcam                               | 1:1000 O<br>1:500 T  | ab5392      | <a href="http://www.abcam.com/map2-antibody-ab5392.html">http://www.abcam.com/map2-antibody-ab5392.html</a>                                                                                                                                   |
| hMito           | Mouse   | Abcam                               | 1:1000               | ab92824     | <a href="http://www.abcam.com/mitochondria-antibody-113-1-ab92824.html">http://www.abcam.com/mitochondria-antibody-113-1-ab92824.html</a>                                                                                                     |
| NeuN            | Rabbit  | Abcam                               | 1:4000 O<br>1:1000 T | ab177487    | <a href="http://www.abcam.com/neun-antibody-epr12763-neuronal-marker-ab177487.html">http://www.abcam.com/neun-antibody-epr12763-neuronal-marker-ab177487.html</a>                                                                             |
| huNuclei        | Mouse   | EMD Millipore                       | 1:200                | MAB1281     | <a href="http://www.emdmillipore.com/US/en/product/Anti-Nuclei-Antibody-clone-235-1_MM_NF-MAB1281">http://www.emdmillipore.com/US/en/product/Anti-Nuclei-Antibody-clone-235-1_MM_NF-MAB1281</a>                                               |
| Olig2           | Rabbit  | EMD Millipore                       | 1:500                | AB9610MI    | <a href="https://www.fishersci.com/shop/products/anti-olig-2-antibody/ab9610mi">https://www.fishersci.com/shop/products/anti-olig-2-antibody/ab9610mi</a>                                                                                     |
| Pax-6           | Rabbit  | Biologend                           | 1:400                | 901301      | <a href="https://www.biologend.com/en-us/products/purified-anti-pax-6-antibody-11511">https://www.biologend.com/en-us/products/purified-anti-pax-6-antibody-11511</a>                                                                         |
| PSD95           | Mouse   | Antibodies Inc.                     | 1:400                | 75-028      | <a href="http://catalog.antibodiesinc.com/item/neuromabs/scaffold-proteins-2/75-028">http://catalog.antibodiesinc.com/item/neuromabs/scaffold-proteins-2/75-028</a>                                                                           |
| S100            | Rabbit  | Dako                                | 1:5000               | Z0311       | <a href="https://www.agilent.com/en-us/products/immunohistochemistry/antibodies-controls/primary-antibodies/s100">https://www.agilent.com/en-us/products/immunohistochemistry/antibodies-controls/primary-antibodies/s100</a>                 |
| SMI 312         | Mouse   | Biologend                           | 1:1000               | 837904      | <a href="https://www.biologend.com/en-us/products/purified-anti-neurofilament-marker-pan-axonal-cocktail-12811">https://www.biologend.com/en-us/products/purified-anti-neurofilament-marker-pan-axonal-cocktail-12811</a>                     |
| SOX2            | Goat    | Santa Cruz                          | 1:250                | sc-17320    | <a href="https://www.scbt.com/scbt/product/sox-2-antibody-y-17">https://www.scbt.com/scbt/product/sox-2-antibody-y-17</a>                                                                                                                     |
| Synapsin I      | Rabbit  | EMD Millipore                       | 1:100                | 574778      | <a href="http://www.emdmillipore.com/US/en/product/Anti-Synapsin-I-Rabbit-pAb,EMD_BIO-574778">http://www.emdmillipore.com/US/en/product/Anti-Synapsin-I-Rabbit-pAb,EMD_BIO-574778</a>                                                         |
| huSynapto-hysin | Mouse   | eBioscience                         | 1:500                | 14-6525-80  | <a href="https://www.fishersci.se/shop/products/synaptophysin-mouse-anti-human-clone-ep10-ebioscience/p-7069519">https://www.fishersci.se/shop/products/synaptophysin-mouse-anti-human-clone-ep10-ebioscience/p-7069519</a>                   |
| RFP (tdTomato)  | Rabbit  | Rockland Imm.                       | 1:1000               | NC9590225   | <a href="https://www.fishersci.com/shop/products/afinity-purified-anti-rfp/nc9590225">https://www.fishersci.com/shop/products/afinity-purified-anti-rfp/nc9590225</a>                                                                         |
| Alexa Fluor 488 | Chicken | Jackson ImmunoResearch Laboratories | 1:200                | 703-545-155 | <a href="https://www.jacksonimmuno.com/catalog/products/703-545-155">https://www.jacksonimmuno.com/catalog/products/703-545-155</a>                                                                                                           |
|                 | Goat    |                                     |                      | 705-545-147 | <a href="https://www.jacksonimmuno.com/catalog/products/703-545-147">https://www.jacksonimmuno.com/catalog/products/703-545-147</a>                                                                                                           |
|                 | Mouse   |                                     |                      | 715-545-151 | <a href="https://www.jacksonimmuno.com/catalog/products/703-545-151">https://www.jacksonimmuno.com/catalog/products/703-545-151</a>                                                                                                           |
|                 | Rabbit  |                                     |                      | 711-545-152 | <a href="https://www.jacksonimmuno.com/catalog/products/703-545-152">https://www.jacksonimmuno.com/catalog/products/703-545-152</a>                                                                                                           |

|        |                 |                                                                                                                                     |             |                                                                                                                                     |
|--------|-----------------|-------------------------------------------------------------------------------------------------------------------------------------|-------------|-------------------------------------------------------------------------------------------------------------------------------------|
|        | Rat             |                                                                                                                                     | 712-545-153 | <a href="https://www.jacksonimmuno.com/catalog/products/703-545-153">https://www.jacksonimmuno.com/catalog/products/703-545-153</a> |
| Cy3    | Chicken         | 1:200                                                                                                                               | 703-165-155 | <a href="https://www.jacksonimmuno.com/catalog/products/703-165-155">https://www.jacksonimmuno.com/catalog/products/703-165-155</a> |
|        | Goat            |                                                                                                                                     | 705-165-147 | <a href="https://www.jacksonimmuno.com/catalog/products/703-165-147">https://www.jacksonimmuno.com/catalog/products/703-165-147</a> |
|        | Mouse           |                                                                                                                                     | 715-165-151 | <a href="https://www.jacksonimmuno.com/catalog/products/703-165-151">https://www.jacksonimmuno.com/catalog/products/703-165-151</a> |
|        | Rabbit          |                                                                                                                                     | 711-165-152 | <a href="https://www.jacksonimmuno.com/catalog/products/703-165-152">https://www.jacksonimmuno.com/catalog/products/703-165-152</a> |
|        | Rat             |                                                                                                                                     | 712-165-153 | <a href="https://www.jacksonimmuno.com/catalog/products/703-165-153">https://www.jacksonimmuno.com/catalog/products/703-165-153</a> |
|        | Alexa Fluor 647 |                                                                                                                                     | Chicken     | 1:200                                                                                                                               |
| Goat   | 705-605-147     | <a href="https://www.jacksonimmuno.com/catalog/products/703-605-147">https://www.jacksonimmuno.com/catalog/products/703-605-147</a> |             |                                                                                                                                     |
| Mouse  | 715-605-151     | <a href="https://www.jacksonimmuno.com/catalog/products/703-605-151">https://www.jacksonimmuno.com/catalog/products/703-605-151</a> |             |                                                                                                                                     |
| Rabbit | 711-605-152     | <a href="https://www.jacksonimmuno.com/catalog/products/703-605-152">https://www.jacksonimmuno.com/catalog/products/703-605-152</a> |             |                                                                                                                                     |
| Rat    | 712-605-153     | <a href="https://www.jacksonimmuno.com/catalog/products/703-605-153">https://www.jacksonimmuno.com/catalog/products/703-605-153</a> |             |                                                                                                                                     |
